# Supplementary material for: The Heterogeneity of Mental Health Assessment
Source: Front Psychiatry. 2020 Feb 27;11:76. doi: 10.3389/fpsyt.2020.00076 (PMC7057249; doi:10.3389/fpsyt.2020.00076)
Supplement: Supplementary file 1 [file DataSheet_1.xlsx]

## Sheet: Supplementary Table 1
Supplementary Table 1: Table of Questionnaires and Interviews included in the final analysis.
Questionnaire Name/Version	Reference	Number of Questions Coded*	Primarily developed for:	Diagnostic or Auxiliary	Reporting Version	Assessment Version	Time Period Version
Depression
APA-Dep-A, APA LEVEL 2, Depression, (Adult)	APA	8	Adults	Auxiliary	Self rated questionnaire	Rating Scale	Past week
BDI-II, Beck Depression Inventory-II	Beck et al., 1996	21	Adults/Adolescents (13+)	Auxiliary	Self rated questionnaire	Multiple choice	Past 2 weeks
CES-D, Center for Epidemiologic Studies Depression Scale	Radloff, 1977	20	Adults (18+)	Auxiliary	Self rated questionnaire	Rating Scale	Past week
CESDR, Center for Epidemiologic Studies Depression Scale Revised	Eaton et al., 2004	20	Adults (18+)	Auxiliary	Self rated questionnaire	Rating Scale	Past week
EPDS, Edinburgh Postnatal Depression Scale	Cox et al., 1987	10	Women (postnatal)	Auxiliary	Self rated questionnaire	Multiple choice	Past week
GDS-LF, Geriatric Depression Scale Long-form	Yesavage et al., 1982	30	Adults (geriatric)	Auxiliary	Self rated questionnaire	Yes/No	Past week
GDS-SF, Geriatric Depression Scale Short-form	Yesavage and Sheikh, 1986	15	Adults (geriatric)	Auxiliary	Self rated questionnaire	Yes/No	Past week
HAMD, Hamilton Depression Rating Scale	Hamilton, 1960	21	Adults	Auxiliary	Clinician rated questionnaire	Multiple choice	No specific time window
IDS, Inventory of Depressive Symptomatology	Rush et al., 1986	30	Adults	Auxiliary	Self rated questionnaire	Multiple choice	Past week
MADRS, Montgomery-Åsberg Depression Rating Scale	Montgomery and Åsberg, 1979	10	Adults	Auxiliary	Clinician rated questionnaire	Multiple choice	Past week
PHQ9, Patient Health Questionnaire 9	Spitzer et al., 1999	10	Adults	Auxiliary	Self rated questionnaire	Rating Scale	Past 2 weeks
QIDS, Quick Inventory of Depressive Symptomatology	Rush et al., 2003	16	Adults	Auxiliary	Self rated questionnaire	Multiple choice	Past week
ZDS, Zung Self-Rating Depression Scale	Zung, 1965	20	Adults	Auxiliary	Self rated questionnaire	Rating Scale	Past week
APA-Dep-C, APA Depression Emerging Measures (Child)	APA	14	Children (11-17)	Auxiliary	Self rated questionnaire	Rating Scale	Past week
CDI2, Children’s Depression Inventory 2	Kovacs, 201; Kovacs, 1985	28	Children (7-17)	Auxiliary	Self rated questionnaire	Multiple choice	Past 2 weeks
CESDC, Center for Epidemiological Studies Depression Scale for Children	Weissman et al., 1980	20	Children (6-17)	Auxiliary	Self rated questionnaire	Rating Scale	Past week
MFQ, Mood and Feelings Questionnaire	Angold et al., 1995	33	Children (6-17)	Auxiliary	Self rated questionnaire	Rating Scale	Past 2 weeks
MFQS, Mood and Feelings Questionnaire (Short version)	Angold et al., 1995	13	Children (6-17)	Auxiliary	Self rated questionnaire	Rating Scale	Past 2 weeks
RADS2, Reynolds Adolescent Depression Scale 2	Reynolds, 2004	30	Adolescents (11-20)	Auxiliary	Self rated questionnaire	Rating Scale	No specific time window
Anxiety
APA-Anx-A, APA Combined Anxiety Emerging Measures (Adult)**	APA	67**	Adults	Auxiliary	Self rated questionnaire	Rating Scale	Past week
BAI, Beck Anxiety Inventory	Beck et al., 1988	21	Adults (17+)	Auxiliary	Self rated questionnaire	Rating Scale	Past week
GAD7, Generalised Anxiety Disorder Assessment	Spitzer et al., 2006	7	Adult/Adolescent (16+)	Auxiliary	Self rated questionnaire	Rating Scale	Past 2 weeks
HAMA, Hamilton Anxiety Rating Scale	Hamilton, 1959	14	Adults/Adolescents	Auxiliary	Clinician rated questionnaire	Rating Scale	No specific time window
LSAS, Liebowitz Social Anxiety Scale	Fresco et al., 2001; Liebowitz, 1987	48	Adults	Auxiliary	Self rated questionnaire	Rating Scale	Past week
SPIN, Social Phobia Inventory	Connor et al., 2000	17	Adults/Adolescents	Auxiliary	Self rated questionnaire	Rating Scale	Past week
STAI, State Trait Anxiety Inventory	Spielberger et al., 1983	40	Adults/Adolescents (16+)	Auxiliary	Self rated questionnaire	Rating Scale	Current/No specific time window
ZAS, Zung Self-Rating Anxiety Scale	Zung, 1971	20	Adults	Auxiliary	Self rated questionnaire	Rating Scale	Past week
APA-Anx-C, APA Combined Anxiety Emerging Measures (Child)**	APA	63**	Children/Adolescents (11-17)	Auxiliary	Self rated questionnaire	Rating Scale	Past week
MASC, Multidimensional Anxiety Scale for Children	March, 1998; March et al., 1997	50	Children/Adolescents (8-19)	Auxiliary	Self rated questionnaire	Rating Scale	No specific time window
RCMAS, Children's Manifest Anxiety Scale - Revised	Reynolds et al., 1978	49	Children/Adolescents (6-19)	Auxiliary	Self rated questionnaire	Yes/No	No specific time window
SCARED, Screen for Child Anxiety Related Disorders	Birmaher et al., 1997; Birmaher et al., 1999	41	Children/Adolescents (8-18)	Auxiliary	Self rated questionnaire	Rating Scale	Past 3 months
SCAS, Spence Children's Anxiety Scale	Spence, 1998	46	Children/Adolescents (8-15)	Auxiliary	Self rated questionnaire	Rating Scale	No specific time window
Post-Traumatic Stress Disorder
APA-PTSD-A, APA PTSD Emerging measures (Adults)	APA	9	Adults	Auxiliary	Self rated questionnaire	Rating Scale	Past week
CAPS-5, Clinician-Administered PTSD Scale for DSM-5 (Adult)	Weathers, 2015; Weathers et al., 2018	137*	Adults	Diagnositic	Clinician led interview	Mixed	Past month
PCL-5, PTSD Checklist for DSM-5	Weathers, 2013; Blevins et al., 2015	20	Adults	Auxiliary	Self rated questionnaire	Rating Scale	Past month
PC-PTSD-5, Primary Care PTSD Screen for DSM-5	Prins et al., 2015; Prins et al., 2016	6	Adults	Auxiliary	Self rated questionnaire	Yes/No	Past month
PSS-SR5, PTSD Scale-Self Report for DSM-5	Foa et al., 1997	26	Adults	Auxiliary	Self rated questionnaire	Rating Scale	Past month
SPRINT, Short PTSD Rating Interview	Connor and Davidson, 2001	6	Adults	Auxiliary	Self rated questionnaire	Rating Scale	Past week
APA-PTSD-C, APA PTSD Emerging measures (Children)	APA	9	Adolescents (11-17)	Auxiliary	Self rated questionnaire	Rating Scale	Past week
CAPS-5-CV, Clinician-Administered PTSD Scale for DSM-5 (Child/Adolescent version)	Pynoos et al., 2015	144*	Children/Adolescents (7+)	Diagnositic	Clinician led interview	Mixed	Past month
CPSS-V, Child PTSD Symptom Scale for DSM-V	Foa et al., 2018	19	Children/Adolescents (8+)	Auxiliary	Self rated questionnaire	Rating Scale	Past month
Bipolar Disorder
ASRMS, Altman Self-Rating Mania Scale	Altman et al., 1997	5	Adults/Adolescents	Auxiliary	Self rated questionnaire	Multiple choice	Past week
HCL32, Hypomania Checklist-32	Angst et al., 2005	43	Adults	Auxiliary	Self rated questionnaire	Yes/No	Lifetime
ISS, Internal State Scale	Bauer et al., 1991	16	Adults	Auxiliary	Self rated questionnaire	Rating Scale	Past 24 hours
MDQ, Mood Disorder Questionnaire	Hirschfeld et al., 2000	15	Adults	Auxiliary	Self rated questionnaire	Yes/No	No specific time window
YMS, Young Mania Scale	Young et al., 1978	11	Adults	Auxiliary	Clinician rated questionnaire	Multiple choice	Past 48 hours
Obsessive Compulsive Disorder
DOCS, Dimensional Obsessive-Compulsive Scale	Abramowitz et al., 2010	20	Adults	Auxiliary	Self rated questionnaire	Multiple choice	Past month
FOCI, Florida Obsessive Compulsive InventoryTM	Storch et al., 2007	25	Adults	Auxiliary	Self rated questionnaire	Yes/No	Past month
OCI-R, Obsessive-Compulsive-Inventory Revised	Foa et al., 2002	18	Adults	Auxiliary	Self rated questionnaire	Rating Scale	Past month
PI-WSUR, Padua Inventory –Washington State University Revision	Burns et al., 1996	39	Adults	Auxiliary	Self rated questionnaire	Rating Scale	No specific time window
VOCI, Vancouver Obsessional Compulsive Inventory	Thordarson et al., 2004	55	Adults	Auxiliary	Self rated questionnaire	Rating Scale	No specific time window
Y-BOCS, Yale Brown Obsessive Compulsive Symptom Scale & ChecklistTM	Goodman et al., 1989; Storch et al., 2010	78	Adults	Auxiliary	Clinician led interview	Mixed	Mixed
CY-BOCS, Children's Yale-Brown Obsessive Compulsive Scale & ChecklistTM	Scahill et al., 1997	74	Children (6-17)	Auxiliary	Clinician led interview	Mixed	Mixed
OCI-CV, Child Version of the Obsessive Compulsive Inventory	Foa et al., 2010	21	Children (7-17)	Auxiliary	Self rated questionnaire	Rating Scale	Past month
Addiction
ADS, Alcohol Dependence Scale	Skinner and Allen, 1982; Skinner, 1984	25	Adults	Auxiliary	Self rated questionnaire	Multiple choice	Past year
ASI-5, Addiction Severity Index 5th Edition	McLellan et al., 1992	164*	Adults	Diagnositic	Clinician led interview	Mixed	Mixed
ASSIST-3, Alcohol, Smoking and Substance Involvement Screening Test 3.0	WHO Assist Working Group, 2002	8	Adults	Auxiliary	Clinician rated questionnaire	Rating scale	Lifetime/Past 3 months
AUDIT, Alcohol Use Disorders Identification Test	Saunders et al., 1993	10	Adults	Auxiliary	Self rated questionnaire	Rating scale	Past year
CAGE, CAGE	Ewing, 1984	4	Adults	Auxiliary	Clinician rated questionnaire	Yes/No	No specific time window
DAST-10,Drug Abuse Screening Test-10	Skinner, 1982	10	Adults/Adolescents	Auxiliary	Self rated questionnaire	Yes/No	Past year
DAST-20, Drug Abuse Screening Test-20	Skinner, 1982	20	Adults/Adolescents	Auxiliary	Self rated questionnaire	Yes/No	Past year
DUDIT, Drug Use Disorders Identification Test	Berman et al., 2005	11	Adults	Auxiliary	Self rated questionnaire	Rating Scale	Past year
MAST, Michigan Alcoholism Screening Test	Selzer, 1971	26	Adults/Adolescents	Auxiliary	Self rated questionnaire	Yes/No	No specific time window
OCDS, Obsessive-Compulsive Drinking Scale	Anton et al., 1995	14	Adults	Auxiliary	Self rated questionnaire	Multiple choice	No specific time window
SMAST, Shortened Michigan Alcoholism Screening Test	Selzer et al., 1975	13	Adults/Adolescents	Auxiliary	Self rated questionnaire	Yes/No	No specific time window
TWEAK, TWEAK	Russell, 1994	5	Pregnant women	Auxiliary	Clinician rated questionnaire	Yes/No	No specific time window
CRAFFT, CRAFFT v2.1	Knight et al., 1999	9	Adolescents/Young adults (12-21)	Auxiliary	Self rated questionnaire	Yes/No	Past year
Autism Spectrum Disorder
AAA, Adult Asperger Assessment	Baron-Cohen et al., 2005	19	Adults	Auxiliary	Clinician rated questionnaire	Yes/No	No specific time window
AQ-A-10, Autism spectrum quotient 10 (Adult)	Allison et al., 2012	10	Adult (16+)	Auxiliary	Self rated questionnaire	Rating Scale	No specific time window
AQ-A, Autism spectrum quotient (Adult)	Baron-Cohen et al., 2001	50	Adult (16+)	Auxiliary	Self rated questionnaire	Rating Scale	No specific time window
BAPQ, Broad Autism Phenotype Questionnaire	Hurley et al., 2007	36	Adults	Auxiliary	Self rated questionnaire	Rating Scale	Adulthood
EQ-A, Emotion Quotient (Adult)	Baron-Cohen and Wheelwright, 2004	40	Adults	Auxiliary	Self rated questionnaire	Rating Scale	No specific time window
SQ-A, Systemizing Quotient (Adult)	Frith et al., 2003	75	Adults	Auxiliary	Self rated questionnaire	Rating Scale	No specific time window
ADI-R, Autism Diagnostic Interview Revised;	Lord et al., 1994; Rutter et al., 2003	434*	Children (2+)	Diagnostic	Clinician led interview	Mixed	Mixed
AQ-Adol-10, Autism spectrum quotient 10 (Adolescent);	Allison et al., 2012	10	Adolescents (12-15)	Auxiliary	Parent rated questionnaire	Rating Scale	No specific time window
AQ-Adol, Autism spectrum quotient (Adolescent);	Baron-Cohen et al., 2006	50	Adolescents (12-15)	Auxiliary	Parent rated questionnaire	Rating Scale	No specific time window
AQ-C-10, Autism spectrum quotient 10 (Child);	Allison et al., 2012	10	Children (4-11)	Auxiliary	Parent rated questionnaire	Rating Scale	No specific time window
AQ-C, Autism spectrum quotient (Child)	Auyeung et al., 2008	50	Children (4-11)	Auxiliary	Parent rated questionnaire	Rating Scale	No specific time window
ASSQ, Autism Spectrum Screening Questionnaire	Ehlers et al., 1999	27	Children	Auxiliary	Parent rated questionnaire	Rating Scale	No specific time window
CARS2-HF, Childhood Autism Rating Scale 2 (High functioning version)	Schopler et al., 1980; Schopler et al., 2010	15	Children (2+)	Auxiliary	Clinician rated questionnaire	Rating scale	Current
CARS2-ST, Childhood Autism Rating Scale 2 (Standard version)	Schopler et al., 1980; Schopler et al., 2010	15	Children (2+)	Auxiliary	Clinician rated questionnaire	Rating scale	Current
CAST, Childhood Autism Spectrum Test	Scott et al., 2002	38	Children	Auxiliary	Parent rated questionnaire	Yes/No	No specific time window
EQ-Adol, Emotion Quotient (Adolescent)	Auyeung et al., 2012	40	Adolescents (12-15)	Auxiliary	Parent rated questionnaire	Rating Scale	No specific time window
EQSQ, Child Emotion Quotient - Systemizing Quotient	Auyeung et al., 2009	55	Children (4-11)	Auxiliary	Parent rated questionnaire	Rating Scale	No specific time window
GARS-3, Gilliam Autism Rating Scale, 3rd Edition	Gilliam, 2014	59	Children/Adolescents (3-22)	Auxiliary	Parent rated questionnaire	Rating Scale	No specific time window
M-Chat, M-Chat Revised, 2018 edition	Robins et al., 2001; Robins et al., 2014	20	Children (16-30 months)	Auxiliary	Parent rated questionnaire	Yes/No	No specific time window
SCQ, Social Communication Questionnaire	Rutter, 2003	40	Children (4+)	Auxiliary	Parent rated questionnaire	Yes/No	Past 3 months
SQ-Adol, Systemizing Quotient (Adolescent)	Auyeung et al., 2012	55	Adolescents (12-15)	Auxiliary	Parent rated questionnaire	Rating Scale	No specific time window
SRS2, Social Responsiveness Scale-2	Constantino and Gruber, 2012	65	Children (2.5+)	Auxiliary	Parent rated questionnaire	Rating Scale	Past 6 months
Attention-Deficit/Hyperactivity Disorder
ASRS-5, World Health Organization ADHD Self-Report Screening Scale for DSM-5	Ustun et al., 2017	6	Adults	Auxiliary	Self rated questionnaire	Rating Scale	Past 6 months
ASRS-Checklist, Adult ADHD Self-Report Scale Symptom Checklist	Kessler et al., 2005	18	Adults	Auxiliary	Self rated questionnaire	Rating Scale	Past 6 months
CAARS, Conners Adult ADHD Rating Scale (S-L)	Conners et al., 1999	66	Adults	Auxiliary	Self rated questionnaire	Rating Scale	No specific time window
DIVA 2, Diagnostic Interview for ADHD 2.0	Kooij, 2012	51*	Adults	Diagnostic	Clinician led interview	Mixed	Childhood/past 6 months
WURS, Wender Utah Rating Scale	Ward, 1993	61	Adults	Auxiliary	Self rated questionnaire	Rating Scale	Childhood
APA Inatt, APA Inattention Emerging Measures (SNAP-IV)	APA	8	Children/Adolescents (6-17)	Auxiliary	Parent rated questionnaire	Rating Scale	Past week
Conners 3, Conners-3rd EditionTM	Conners et al., 2011	108	Children/Adolescents (6-18)	Auxiliary	Parent rated questionnaire	Rating Scale	Past month
DBDRS, Disruptive Behavior Disorders Rating Scale	Pelham et al., 1992	45	Children	Auxiliary	Parent rated questionnaire	Rating Scale	No specific time window
NICHQ, NICHQ Vanderbilt Assessment Scale	Wolraich et al., 2003	55	Children (6-12)	Auxiliary	Parent rated questionnaire	Rating Scale	Past 6 months
Eating Disorders
BITE, Bulimic Investigatroy Test, Edinburgh	Henderson & Freeman, 1987	36	Adults/Adolescents	Auxiliary	Self rated questionnaire	Yes/No	Past 3 months
EAT-26, Eating Attitudes Test-26	Garner et al., 1982	26	Adults/Adolescents	Auxiliary	Self rated questionnaire	Rating Scale	No specific time window
EDDS, Eating disorder diagnostic scale	Stice et al., 2000	22	Adults/Adolescents (13+)	Auxiliary	Self rated questionnaire	Mixed	Past 3 months / Past 6 months
EDE-Q, Eating Disorder Examination Questionnaire	Fairburn et al., 2008	28	Adults/Adolescents (14+)	Auxiliary	Self rated questionnaire	Rating Scale	Past month
EDI-3, Eating Disorder Inventory, Third edition	Garner, 2004	113	Adults/Adolescents (13+)	Auxiliary	Self rated questionnaire	Rating Scale	No specific time window
SCOFF, SCOFF	Morgan et al., 1999	5	Adults/Adolescents	Auxiliary	Self rated questionnaire	Yes/No	No specific time window
Schizophrenia
BPRS, Brief Psychiatric Rating Scale	Overall and Gorham, 1962; Ventura et al., 1993	24	Adults	Auxiliary	Clinician rated questionnaire	Rating Scale	Current
CGI-SCH, Clinical Global Impression-Schizophrenia scale	Haro et al., 2003	4	Adults	Auxiliary	Clinician rated questionnaire	Rating Scale	Past week
NSA-16, Negative Symptom Assessment	Axelrod et al., 1993	16	Adults	Auxiliary	Clinician rated questionnaire	Rating Scale	Current
PANSS, Positive and Negative Syndrome Scale	Kay et al., 1987	33	Adults	Auxiliary	Clinician rated questionnaire	Rating Scale	No specific time window
SANS, Scale for the Assessment of Negative Symptoms	Andreasen, 1989; Andreasen, 1982; Andreasen, 1983	25	Adults	Auxiliary	Clinician rated questionnaire	Rating Scale	Past month
SAPS, Scale for the Assessment of Positive Symptoms	Andreasen, 1984	34	Adults	Auxiliary	Clinician rated questionnaire	Rating Scale	No specific time window
Cross Disorder Tools
APA-CC-A, APA DSM–5 Self-Rated Level 1 Cross-Cutting Symptom Measure (Adult)	APA	23	Adults (18+)	Auxiliary	Self rated questionnaire	Rating Scale	Past 2 weeks
BSI, Brief Symptom Inventory	Derogatis and Melisaratos, 1983	53	Adults/Adolescents (13+)	Auxiliary	Self rated questionnaire	Rating Scale	Past week
CIDI CAPI, World Health Organization Composite International Diagnostic Interview, Computer Assisted Personal Interview, Version 21.1.4	Andrews and Peters, 1998; Robins et al., 1988	1228*	Adults	Diagnostic	Clinician led interview	Mixed	Mixed
K10+, Kessler Psychological Distress Scale	Kessler et al., 2002	15	Adults	Auxiliary	Self rated questionnaire	Rating Scale	Past month
MINI, Mini International Neuropsychiatric Interview	Sheehan et al., 1998	282*	Adults	Diagnostic	Clinician led interview	Mixed	Mixed
PROMIS-Profile-A, PROMIS Profile 57 (Adult)	Cella et al., 2007; Cella et al., 2010	57	Adults (18+)	Auxiliary	Self rated questionnaire	Rating Scale	Past week
PROMIS-QB-A, PROMIS Question Bank (Adult)	Cella et al., 2007; Cella et al., 2010	770*	Adults (18+)	Auxiliary	Self rated questionnaire	Rating Scale	Mixed
SCID-5-CV, Structured Clinical Interview for DSM-5 - Clinical version	First et al., 2016	722*	Adults	Diagnostic	Clinician led interview	Mixed	Mixed
SCL-90-R, Symptom Checklist 90 Revised	Derogatis, 1992	90	Adults/Adolescents (13+)	Auxiliary	Self rated questionnaire	Rating Scale	Past week
APA-CC-C, APA DSM–5 Self-Rated Level 1 Cross-Cutting Symptom Measure (Child)	APA	25	Children/Adolescents (11-17)	Auxiliary	Self rated questionnaire	Rating Scale	Past 2 weeks
CBC, Child behaviour Checklist	Achenbach, 2001	146	Children/adolescents (6-18)	Auxiliary	Parent rated questionnaire	Rating Scale	Past 6 months
DISC-IV, Diagnostic Interview Schedule for Children	Shaffer et al., 2000	1893*	Children	Diagnostic	Clinician led interview	Mixed	Mixed
KSADS-PL-5, Kiddie Schedule for Affective Disorders and Schizophrenia, Lifetime Version, DSM-5	Kaufman et al., 1997	483*	Children	Diagnostic	Clinician led interview	Mixed	Lifetime
PROMIS-Profile-C, PROMIS Profile 49 (Child)	Cella et al., 2007; Cella et al., 2010	49	Children/Adolescents (11-17)	Auxiliary	Self rated questionnaire	Rating Scale	Past week
PROMIS-QB-C, PROMIS Question Bank (Child)	Cella et al., 2007; Cella et al., 2010	329*	Children (8-17)	Auxiliary	Self rated questionnaire	Rating Scale	Mixed
SDS, Strengths and Difficulties Scale	Goodman, 2001	25	Children/adolescents (4-17)	Auxiliary	Self rated questionnaire	Rating Scale	Past 6 months
*Number of questions analyzed, some of which are optional
**includes multiple APA anxiety measures including:
Adults
APA severity measure- social anxiety disorder	APA	10	Adults	Auxiliary	Self rated questionnaire	Rating Scale	Past week
APA severity measure - agoraphobia	APA	10	Adults	Auxiliary	Self rated questionnaire	Rating Scale	Past week
APA severity measure - specific phobia	APA	10	Adults	Auxiliary	Self rated questionnaire	Rating Scale	Past week
APA severity measure - separation anxiety	APA	10	Adults	Auxiliary	Self rated questionnaire	Rating Scale	Past week
APA severity measure - Generalized anxiety	APA	10	Adults	Auxiliary	Self rated questionnaire	Rating Scale	Past week
APA severity measure - panic disorder	APA	10	Adults	Auxiliary	Self rated questionnaire	Rating Scale	Past week
APA emerging measure- anxiety	APA	7	Adults	Auxiliary	Self rated questionnaire	Rating Scale	Past week
Children/Adolescents
APA severity measure - social anxiety disorder	APA	10	Adolescents (11-17)	Auxiliary	Self rated questionnaire	Rating Scale	Past week
APA severity measure - agoraphobia	APA	10	Adolescents (11-17)	Auxiliary	Self rated questionnaire	Rating Scale	Past week
APA severity measure - specific phobia	APA	10	Adolescents (11-17)	Auxiliary	Self rated questionnaire	Rating Scale	Past week
APA severity measure - separation anxiety	APA	10	Adolescents (11-17)	Auxiliary	Self rated questionnaire	Rating Scale	Past week
APA severity measure - generalized anxiety	APA	10	Adolescents (11-17)	Auxiliary	Self rated questionnaire	Rating Scale	Past week
APA emerging measure- anxiety	APA	13	Adolescents (11-17)	Auxiliary	Self rated questionnaire	Rating Scale	Past week
SCID modules included: Overview; Mood Episodes; Psychotic & Associated Symptoms; Substance Use Disorders; Anxiety Disorders; Obsessive-Compulsive Disorder & Posttraumatic Stress Disorder; Adult Attention-Deficit/Hyperactivity Disorder; Screener
CIDI-CAPI modules included: Screener; Depression; Mania; Panic; Social Phobia; Agoraphobia; Generalized Anxiety Disorder; Suicidality; Alcohol Use; Illegal Substance Use; PTSD; Eating Disorders; 30 day symptoms; Obsessive Compulsive Disorder; Psychosis; ADHD; Oppositional Defiant Disorder; Conduct Disorder; Separation Anxiety
DISC-IV modules included: Social Phobia; Separation Anxiety Disorder; Panic; Agoraphobia; Generalized Anxiety Disorder; Obsessive Compulsive Disorder; PTSD; Major depressive disorder; Manic/hypomanic; Schizophrenia; Attention-Deficit/Hyperactivity Disorder; Oppositional Defiant Disorder; Conduct Disorder; Eating Disorder; Alcohol Abuse; Other substances
KSADS modules included: Depression; Suicide; Mania-Hypermania; Disruptive Mood Dysregulation Disorder; Psychosis; Panic Disorder; Agoraphobia; Separation anxiety; Social Anxiety; Specific Phobias; Generalized Anxiety Disorder; Obsessive Compulsive Disorder; Attention Deficit Hyperactivity; Oppositional Defiant Disorder; Conduct Disorder; Autism Spectrum Disorders; Eating Disorders; Alcohol Use /A…
MINI modules included: Major Depressive Episode; Suicidality; Manic & Hypomanic Episodes; Panic Disorder; Agoraphobia; Social Anxiety Disorder; Obsessive Compulsive Disorder; Posttraumatic Stress Disorder; Alcohol use disorder; Substance use disorder; Psychotic Disorders and Mood disorder with psychotic features; Anorexia; Bulimia; Generalized Anxiety Disorder; Antisocial personality Disorder; Ad…
Modules included from PROMIS Adult Item Bank: Alcohol - Alcohol Use; Alcohol - Negative Consequences; Alcohol - Positive Consequences; Anxiety; Appeal of Substance Use; Applied Cognition Abilities; Applied Cognition - General Concerns; Depression; Meaning and Purpose; General Life Satisfaction; Positive affect; Self-Efficacy (General); Self-Efficacy (Managing Emotions); Severity of Substance Use;…
Modules included from PROMIS Pediatric Bank: Cognitive Function; Family Relationships; Life Satisfaction; Meaning and Purpose; Physical Stress Experiences; Positive Affect; Psychological Stress Experiences; Anxiety; Depression; Peer relationships; Fatigue

## Sheet: Supplementary Table 2
Supplementary Table 2: Mapping of preliminary codings to symptom categories.
Symptom Category	Includes Questions About:
Attention, Concentration & Mental Focus	Making Careless Mistakes; Attention to detail; Big picture focus; Concentration; Ability to sustain attention; Attention span; Ease of Distractibility; Disorganized thoughts; Slowed thinking; Mental fog, Racing thoughts [also includes questions which jointly ask about attention & decision making or attention and memory]
Activity Level	Being always on the go; Driven by a motor; Motor hypoactivity; Motor hyperactivity; Activity levels; Talkativeness; Quietness
Aggression, Threats & Violence	Aggressive behaviors or intentions; Anger attacks; Sexual aggression or violence; Bullying; Threatening behaviors; Intimidation; Destructiveness; Violence or Cruelty to people or animals
Allergies & Rashes	Allergies; Rashes
Anger & Irritability	Anger; Irritability; Frustration; How Easily Annoyed; Jealousy; Sulkiness; Whining; Temper Outbursts; Short tempered
Attachment & Affiliation	Family & Peer relationships; Making friends, Detachment/Disconnection from others; Closeness; Loneliness; Separation anxiety; Need for reassurance
Avoidance & Self Distraction	Avoidance (including not doing something as a form of avoidance); Preparation/procrastination & distraction to put things off
Confidence & Self Judgement	Confidence; Shyness; Exaggerated confidence; Self worth; Inferiority; Failure; Disappointment; Embarrassment; Self consciousness; Guilt; Blame; Feeling responsible; Being punished
Decision-making, Risk-taking & Planning	Decision-making; Indecision; Irrationality; Organizational skills; Planning; Risk-taking; Recklessness
Defiance & Disobedience	Argumentativeness; Breaking rules; Disobedience; Lying; Stealing; Swearing; Truancy; Running away
Digestive Complaints	Constipation; Diarrhea; Nausea/Vomiting; Swallowing; Stomach Aches; General gastrointestinal complaints
Distress & Trauma	Crying; Being Upset; Upset by<x>; Stress; Overwhelm; Distress; Distressed by<x>; Bothered by <x>; Flashbacks; Unwanted memories; Nightmares; General PTSD symptoms
Emotional Instability	Mixed states (Depressed/High/Irritable mood); Manic episodes; Mood swings; Seasonal/diurnal variation in mood
Energy Levels	Energy levels; Need for sleep; Not getting tired/sleepy; Tiredness; Fatigue; Daytime sleepiness
Fear, Panic & Anxiety	Fear; Fear of <x>; Worry; Worry of <x>; Anxiety; Anxiety of <x>; Concerned by <x>; Uneasy; Uncomfortable; On edge; Strained; Out to get me; Startle response; Hypervigilance; Nervousness; Agitation; Jitters; Strained; Tense; Panic; Panic Attack; Phobias [includes questions which include a mix of fear/worry and avoidance]
Flexibility	Flexibility; Rigidity; Multitasking; Switching between activities; Stubbornness; Tolerance for change; Tolerance for interruption
Habits & Routines	Physical habits; Rituals & Routines; Sleeping habits;
Health Condition	Any Medical diagnosis or injury; Health concerns
Inhibition & Impulsivity	Difficulty waiting turn; Hyperactivity (inappropriate); Impulsivity; Interrupting; Noisy; Not sitting still
Interest, Effort & Motivation	Interest & Boredom; Interest in <x>; Preference for <x>; How spend time; Enjoyment & Enthusiasm; Pleasure; Initiative; Task Completion; Effort; Disliking difficult tasks
Interpersonal	Annoys others; Blames others; Spitefulness; Teasing; Suspiciousness; Conversational skills & style; Listening; Responding; Cooperation; Joining in ; Outgoing/Sociable; Dominance; Dependence; Boastfulness; Social Engagement; Social understanding (including understanding intentions/feelings of others); Social appropriateness; Imitation; Social Withdrawal; Speech & Language
Involuntary, Bizarre & Repetitive Actions	Immobility; Stupor; Repetitive or bizarre movements, mannerisms or posturing; Tics
Learning & Development	Developmental milestones; Intellect; Maturity; Learning performance; Learning difficulties; Play
Memory & Forgetting	Memory performance; Forgetfulness; Memory problems; Memory Blocking; Losing things; Need to remember
Mind-wandering & Delusions	Daydreaming; Imagination; Delusions; Strange thoughts; Unreal/Dreamlike Surroundings
Mood & Outlook	Depression; Unhappiness; Sadness; Helplessness; Inability to feel positive; Future outlook; Hope; Negative beliefs; Life satisfaction; Life meaning; Happiness; Excitement; Contentment; Optimism/Pessimism [includes questions which ask about multiple negative mood states]
Motor Coordination	Motor coordination
Muscular Complaints	Muscle tension, aches or heaviness
Nonverbal Communication	Emotional Expressiveness; Facial Expressions; Eye contact; Eye gaze; Gestures; Body use
Obsessions & Compulsions	Unpleasant thoughts; Contamination concerns; Superstitiousness; Need for Order; Perfectionism; Need to Confess; Checking; Counting; Hoarding; Repetitive behaviors or thoughts; Ritualized Cleaning; Need to touch
Pains & Aches	Aches & pains; Chest Pain; Headaches; Pain tolerance
Physiological Response	Breathing; Choking; Dizziness; Fainting; Lightheadedness; Dry mouth, Flushed Hot & Cold; Heart pounding; Heart racing; Numbness & tingling; Sweating; Trembling; Shaking [Also includes other physical symptoms or where there are multiple physical symptoms included in one question]
Problem Solving	Problem solving; Creative ideas; Pattern recognition
Restlessness & Impatience	Fidgeting; Restlessness; Impatience; Calmness; Relaxation
Self Control & Emotional Regulation	Controlling behaviors; Resisting thoughts; Controlling emotions; Self control; Feeling like you are "Going crazy",
Self-perception, Awareness & Appearance	Detachment from self; Self awareness; Sense of Self; Appearance; Body Image
Self-harm & Suicide	Self-harm; Suicide
Sensations, Perceptions & Hallucinations	Hallucinations; Sensory problems; Sensory sensitivity
Sexual Problems & Interest	Sexual behaviors; Sexual interest; Sexual problems
Sleeping, Waking & Daytime Sleepiness	Sleep quality (waking, duration, falling asleep, insomnia) & sleep problems
Substance Use & Addiction	Drinking habits; Drug Habits; Gambling Habits; Smoking habits
Urination Problems	Wetting; Soiling; Urinary problems
Weight, Appetite & Eating	Appetite; Weight; Eating habits & strategies

## Sheet: Supplementary Table 3
Supplementary Table 3: Numerical values for data in figures 4-8.
FIGURE 4	Fear, panic & anxiety	Mood & outlook	Confidence & self judgement	Interpersonal	Attention, concentration & mental focus	Decision-making, risk-taking & planning	Anger & irritability	Distress & trauma	Interest, effort & motivation	Avoidance & self distraction	Attachment & affiliation	Mind-wandering & delusions	Self-control & emotional regulation	Self-harm & suicide	Self-perception, awareness & appearance	Inhibition & impulsivity	Memory & forgetting	Aggression, threats & violence	Obsessions & compulsions	Activity level	Physiological response	Sleeping, waking & daytime sleepiness	Sensations, perceptions & hallucinations	Restlessness & impatience	Defiance & disobedience	Digestive complaints	Weight, appetite & eating	Learning & development	Energy levels	Emotional instability	Habits & routines	Pains & aches	Substance use & addiction	Sexual problems & interest	Flexibility	Health condition	Problem solving	Nonverbal communication	Involuntary, bizarre & repetitive actions	Muscular complaints	Urination problems	Motor coordination	Allergies & rashes
Depression	4.94304	24.123	12.5082	1.43769	4.79367	1.03668	1.21212	4.6245	8.0202	0.877193	5.0886	0.501253	0	4.37543	0.598086	0	0.714286	0	0.250627	1.79426	0.689223	7.0483	0	1.77049	0.175439	0.789474	6.27136	0.18797	3.95094	0.601504	0	0.175439	0	0.93985	0	0.250627	0	0	0	0.250627	0	0	0
Anxiety	37.0933	3.72295	3.63566	2.08952	1.09105	0.932358	1.41287	3.90306	0	11.7249	2.11177	0.341463	2.66745	0	0	0.156986	0	0	2.24582	0	15.1004	1.09105	0.549451	3.60143	0	2.15366	0	0.167224	0.541601	0	0.153846	0.729219	0	0	0	0	0	0	0	1.84881	0.934066	0	0
PTSD	15.0304	5.81079	7.71966	2.16503	1.93607	2.362	4.74944	29.6968	5.14886	3.21529	2.362	1.42974	7.61801	0.0771605	1.42974	0	3.56207	0	0	0	2.362	1.61835	0	0	0	0	0	0	0	0	0.31772	1.38889	0	0	0	0	0	0	0	0	0	0	0
Bipolar	1.25	18.3748	7.16638	7.01615	5.57056	4.80836	4.98456	0	1.95122	0	0	1.81818	0	0	4.12417	1.25	0	1.81818	0	14.9009	0	7.73456	0	2.5	1.7378	0	0.487805	0	3.65418	2.67857	0	0	1.46341	4.22236	0	0	0.487805	0	0	0	0	0	0
OCD	16.9202	0.320513	0.641026	0	0.227273	1.06935	0	10.911	0.160256	4.02855	0	0.320513	5.86585	0.809945	0	1.92308	0.556448	0.329175	53.5045	0	0	0	0	0	0	0	0.168919	0	0	0	2.24335	0	0	0	0	0	0	0	0	0	0	0	0
Addiction	0.995743	0.1386	5.43303	0.1386	0.446292	0.854701	1.92308	1.24245	0	0	1.1088	0.0693001	7.5106	0.2079	0	0	3.68902	1.65067	0	0	0.923077	0	1.97292	0	2.33195	1.46154	0	0	0	0	0	0	65.3515	0	0	2.55019	0	0	0	0	0	0	0
ASD	1.07465	0.0212902	0.13986	40.3228	6.07959	1.7393	0.548428	2.21285	12.2443	0.304401	4.94429	0.909402	0	0.134927	0.335119	0	1.75773	0.471481	0.725236	0.324675	0.0425804	0	2.93992	0.0699301	0.0826446	0	0	6.26974	0	0	0.56271	0	0	0	6.08679	0	2.10568	5.78302	1.52839	0	0	0.23828	0
ADHD	1.34032	0.981688	2.70218	8.81083	14.3764	7.37653	3.5402	0.103842	5.88727	3.16303	2.23116	0	0.285992	0	0	14.5634	5.5854	5.40971	0	4.71174	0	0.182149	0.103842	6.19117	5.81309	0.546448	0	4.1565	0.103842	0.454342	0	0.182149	0	0	0.285992	0	0	0	0	0	0.182149	0.364299	0.364299
Eating Disorder	8.93525	6.19889	9.02297	4.17767	0	0	0.30303	3.60696	1.09557	1.92308	0.757576	0	11.052	0.151515	8.50124	0.151515	0	0	2.66252	0	0	0	0	0	0	0.151515	40.7026	0	0	0.30303	0	0	0.30303	0	0	0	0	0	0	0	0	0	0
Psychosis	3.19444	9.23611	2.5	19.1757	8.60131	0.555556	0.555556	0	10.8889	0.555556	2	8.73366	0.555556	0.694444	4.00408	0.555556	0	1.18464	0	3.83333	0	0	8.84804	0	0	0	0	0	0	0	0	0	0	2.19853	0.555556	0.555556	0.555556	6.98611	3.47631	0	0	0	0
Cross-Category	12.2544	11.1858	3.19185	4.06656	3.19915	1.5293	2.92427	6.09685	4.42719	0.846198	5.22413	2.28731	1.18322	2.59988	0.480062	0.661681	1.52828	1.99692	2.70946	0.501458	2.28993	2.87052	1.84617	2.0848	2.18599	0.830359	1.8371	0.558262	3.73027	1.15459	0.160781	3.46116	5.55537	0.41725	0.27857	0.706292	0.140429	0.198142	0.278869	0.269212	0.0868056	0.121741	0.0434028
FIGURE 5	Depression	Anxiety	PTSD	Bipolar	OCD	Addiction	ASD	ADHD	Eating Disorder	Schizophrenia
Depression	38.8407	12.8693	23.5275	27.7924	7.05214	5.56001	10.7553	15.6926	20.1495	17.882
Anxiety	12.8693	36.6812	21.9642	8.10474	18.6106	3.94919	4.92967	8.3965	12.7675	6.82378
PTSD	23.5275	21.9642	44.6089	14.7152	20.8441	9.20663	10.6589	15.3482	21.2655	13.4569
Bipolar	27.7924	8.10474	14.7152	28.9892	1.84943	4.38219	9.09759	20.7286	12.7695	21.3821
OCD	7.05214	18.6106	20.8441	1.84943	58.164	3.97524	3.17956	4.37123	12.4109	3.05627
Addiction	5.56001	3.94919	9.20663	4.38219	3.97524	51.0994	2.13112	5.56408	7.62058	3.2266
ASD	10.7553	4.92967	10.6589	9.09759	3.17956	2.13112	42.6366	17.6826	5.51435	25.4651
ADHD	15.6926	8.3965	15.3482	20.7286	4.37123	5.56408	17.6826	36.8931	7.69946	17.5893
Eating Disorder	20.1495	12.7675	21.2655	12.7695	12.4109	7.62058	5.51435	7.69946	49.7937	11.9186
Schizophrenia	17.882	6.82378	13.4569	21.3821	3.05627	3.2266	25.4651	17.5893	11.9186	29.3658
Figure 6A - Depression	% EMOTION	% BEHAVIOR	% COGNITIVE	% PHYSICAL	% CONSEQUENCE	% TRIGGER	% TREATMENT
APA-Dep-A	100	0	0	0	0	0	0
BDI-II	57.1429	2.38095	16.6667	23.8095	0	0	0
CES-D	70	10	7.5	12.5	0	0	0
CESDR	47.5	5	12.5	35	0	0	0
EPDS	65	10	15	5	0	5	0
GDS-LF	68.3333	5	21.6667	3.33333	0	1.66667	0
GDS-SF	70	6.66667	20	3.33333	0	0	0
HAMD	21.4286	7.14286	23.8095	42.8571	4.7619	0	0
IDS	36.6667	1.66667	11.6667	45	1.66667	3.33333	0
MADRS	40	5	25	30	0	0	0
PHQ9	35	5	20	30	10	0	0
QIDS	25	0	18.75	56.25	0	0	0
ZDS	42.5	12.5	15	27.5	0	2.5	0
APA-Dep-C	82.1429	0	10.7143	0	7.14286	0	0
CDI2	55.3571	7.14286	10.7143	17.8571	7.14286	1.78571	0
CESDC	72.5	7.5	5	15	0	0	0
MFQ	42.4242	13.6364	28.7879	13.6364	0	1.51515	0
MFQS	61.5385	19.2308	15.3846	3.84615	0	0	0
RADS2	83.3333	0	1.66667	13.3333	0	1.66667	0
Figure 6B - ANXIETY	% EMOTION	% BEHAVIOR	% COGNITIVE	% PHYSICAL	% CONSEQUENCE	% TRIGGER	% TREATMENT
APA-Anx-A,	22.3881	9.70149	14.1791	11.9403	4.47761	32.8358	4.47761
BAI	28.5714	0	0	66.6667	0	4.7619	0
GAD7	78.5714	14.2857	7.14286	0	0	0	0
HAMA	21.4286	7.14286	7.14286	60.7143	0	3.57143	0
LSAS	25	25	0	0	0	50	0
SPIN	26.4706	38.2353	0	2.94118	0	32.3529	0
STAI	85	0	11.25	3.75	0	0	0
ZAS	40	2.5	2.5	55	0	0	0
APA-Anx-C	26.9841	8.73016	12.6984	9.52381	3.96825	34.127	3.96825
MASC	38	36	7	19	0	0	0
RCMAS	63.2653	16.3265	7.14286	11.2245	2.04082	0	0
SCARED	40.2439	4.87805	4.87805	13.4146	3.65854	32.9268	0
SCAS	44.5652	5.43478	5.43478	13.0435	4.34783	27.1739	0
Figure 6C - PTSD	% EMOTION	% BEHAVIOR	% COGNITIVE	% PHYSICAL	% CONSEQUENCE	% TRIGGER	% TREATMENT
APA-PTSD-A	66.6667	5.55556	22.2222	0	0	5.55556	0
CAPS-5	33.4559	9.55882	23.5294	5.51471	6.61765	21.3235	0
PCL-5	50	12.5	25	10	0	2.5	0
PC-PTSD-5	58.3333	0	25	0	0	16.6667	0
PSS-SR5	44.2308	15.3846	21.1538	7.69231	3.84615	7.69231	0
SPRINT	31.25	6.25	6.25	12.5	25	18.75	0
APA-PTSD-C	66.6667	5.55556	22.2222	0	0	5.55556	0
CAPS-5-CV	35.4167	8.33333	27.4306	5.20833	4.86111	18.75	0
CPSSV	44.7368	15.7895	23.6842	5.26316	0	10.5263	0
Figure 6D - BIPOLAR	% EMOTION	% BEHAVIOR	% COGNITIVE	% PHYSICAL	% CONSEQUENCE	% TRIGGER	% TREATMENT
ASRMS	50	40	0	10	0	0	0
HCL32	21.9512	41.4634	15.8537	6.09756	14.6341	0	0
ISS	87.5	0	9.375	3.125	0	0	0
MDQ	17.8571	32.1429	14.2857	17.8571	17.8571	0	0
YMS	22.7273	31.8182	22.7273	22.7273	0	0	0
Figure 6E - OCD	% EMOTION	% BEHAVIOR	% COGNITIVE	% PHYSICAL	% CONSEQUENCE	% TRIGGER	% TREATMENT
DOCS	10	20	30	0	20	20	0
FOCI	20	22	34	0	4	20	0
OCI-R	19.4444	36.1111	25	0	2.77778	16.6667	0
PI-WSUR	10.2564	35.8974	28.2051	0	0	25.641	0
VOCI	22.7273	20	24.5455	0	9.09091	23.6364	0
Y-BOCS	19.2308	25.641	32.6923	0	4.48718	17.9487	0
CY-BOCS	18.2432	26.3514	25.6757	0	6.75676	22.973	0
OCICV	33.3333	33.3333	21.4286	0	7.14286	4.7619	0
Figure 6F - ADDICTION	% EMOTION	% BEHAVIOR	% COGNITIVE	% PHYSICAL	% CONSEQUENCE	% TRIGGER	% TREATMENT
ADS	4	26	32	32	6	0	0
ASI 5	13.964	24.7748	6.30631	3.15315	29.2793	5.40541	17.1171
ASSIST 3	6.25	43.75	6.25	6.25	37.5	0	0
AUDIT	15	45	5	0	30	5	0
CAGE	62.5	37.5	0	0	0	0	0
DAST10	10	40	10	20	20	0	0
DAST20	5	35	5	10	35	0	10
DUDIT	13.6364	54.5455	0	9.09091	22.7273	0	0
MAST	3.84615	17.3077	7.69231	5.76923	46.1538	1.92308	17.3077
OCDS	14.2857	14.2857	42.8571	3.57143	21.4286	3.57143	0
SMAST	7.69231	15.3846	3.84615	0	53.8462	0	19.2308
TWEAK	10	40	0	10	40	0	0
CRAFFT	0	66.6667	11.1111	0	22.2222	0	0
Figure 7A - ASD	% EMOTION	% BEHAVIOR	% COGNITIVE	% PHYSICAL	% CONSEQUENCE	% TRIGGER	% TREATMENT
AAA	21.0526	34.2105	39.4737	0	5.26316	0	0
AQ-A-10	10	10	80	0	0	0	0
AQ-Adult	34	8	51	0	6	1	0
BAPQ	29.1667	27.7778	27.7778	1.38889	13.8889	0	0
EQ-A	30	5	52.5	0	12.5	0	0
SQ-A	28.6667	16.6667	53.3333	0	1.33333	0	0
ADI-R	8.8993	53.1616	16.7447	5.62061	11.5925	3.74707	0.234192
AQ-Adol-10	25	20	55	0	0	0	0
AQ-Adol	34	8	51	0	6	1	0
AQ-C-10	25	20	55	0	0	0	0
AQ-C	35	7	53	0	4	1	0
ASSQ	14.8148	33.3333	27.7778	9.25926	14.8148	0	0
CARS2-HF	17.8571	57.1429	25	0	0	0	0
CARS2-ST	14.2857	71.4286	14.2857	0	0	0	0
CAST	21.0526	42.1053	25	1.31579	10.5263	0	0
EQ-Adol	32.5	6.25	58.75	0	2.5	0	0
EQSQ	41.8182	20.9091	30	0	7.27273	0	0
GARS-3	18.6441	44.0678	31.3559	4.23729	1.69492	0	0
M-Chat	17.5	65	5	5	5	2.5	0
SCQ	18.75	70	8.75	0	2.5	0	0
SQ-Adol	30.9091	17.2727	51.8182	0	0	0	0
SRS2	16.1538	41.5385	33.8462	1.53846	3.07692	3.84615	0
Figure 7B - ADHD	% EMOTION	% BEHAVIOR	% COGNITIVE	% PHYSICAL	% CONSEQUENCE	% TRIGGER	% TREATMENT
ASRS-5	16.6667	58.3333	25	0	0	0	0
ASRS-Checklist	11.1111	52.7778	30.5556	0	2.77778	2.77778	0
CAARS	24.2424	41.6667	32.5758	1.51515	0	0	0
DIVA 2.0	7.84314	48.0392	24.5098	0	17.6471	1.96078	0
WURS	21.3115	27.8689	18.8525	14.7541	16.3934	0.819672	0
APA-Inatt	0	43.75	43.75	0	6.25	6.25	0
Conners 3	14.486	48.1308	21.4953	1.40187	13.0841	1.40187	0
DBDRS	6.66667	81.1111	10	0	1.11111	1.11111	0
NICHQ	16.3636	57.2727	9.09091	0	15.4545	1.81818	0
Figure 7C - EATING DISORDER	% EMOTION	% BEHAVIOR	% COGNITIVE	% PHYSICAL	% CONSEQUENCE	% TRIGGER	% TREATMENT
SCOFF	20	10	20	30	20	0	0
EDI-3	50	11.8182	19.0909	16.8182	1.81818	0.454545	0
EDE-Q	46.4286	35.7143	7.14286	0	7.14286	3.57143	0
EDDS	28.9474	31.5789	15.7895	5.26316	0	18.4211	0
EAT-26	30.7692	28.8462	30.7692	5.76923	3.84615	0	0
BITE	19.4444	61.1111	6.94444	5.55556	5.55556	2.77778	0
Figure 7D - SCHIZOPHRENIA	% EMOTION	% BEHAVIOR	% COGNITIVE	% PHYSICAL	% CONSEQUENCE	% TRIGGER	% TREATMENT
BPRS	31.25	35.4167	25	8.33333	0	0	0
CGI-SCH	37.5	25	37.5	0	0	0	0
NSA16	37.5	50	9.375	3.125	0	0	0
PANSS	26.6667	25	43.3333	5	0	0	0
SANS	28	36	18	6	12	0	0
SAPS	1.47059	23.5294	69.1176	5.88235	0	0	0
Figure 8 - CROSS DISORDER	% EMOTION	% BEHAVIOR	% COGNITIVE	% PHYSICAL	% CONSEQUENCE	% TRIGGER	% TREATMENT
APA-CC-A	34.7826	19.5652	30.4348	13.0435	0	2.17391	0
BSI	78.3019	3.77358	7.54717	10.3774	0	0	0
CIDI CAPI	23.5534	17.1964	10.1467	8.06846	14.0994	14.7107	12.2249
K10	63.3333	3.33333	0	6.66667	13.3333	6.66667	6.66667
MINI	19.9627	26.4925	19.7761	13.4328	7.46269	12.5	0.373134
PROMIS-Profile-A	46.3415	1.21951	3.65854	23.1707	21.9512	2.43902	1.21951
PROMIS-QB-A	47.1037	3.96341	24.8476	10.8232	11.8902	1.37195	0
SCID-5-CV	19.3662	18.8028	12.4648	12.9577	17.6056	15.8451	2.95775
SCL-90-R	40.5556	8.88889	19.4444	22.7778	1.11111	7.22222	0
APA-CC-C,	30	28	24	8	4	6	0
CBC	16.6667	46.5278	7.29167	17.0139	11.8056	0.694444	0
DISC-IV	13.7302	27.9894	14.0741	8.75661	16.3492	15.4233	3.67725
KSADS-PL-5	25.5187	28.0083	15.249	6.12033	12.5519	12.3444	0.207469
PROMIS-Profile-C	43.9024	4.87805	3.65854	13.4146	29.2683	4.87805	0
PROMIS-QB-C	32.6739	7.9809	28.1037	10.8458	11.3915	8.73124	0.272851
SDC	22	50	8	4	16	0	0

## Sheet: Suppplementary Table 4
	Supplementary Table 4: Similarity scores between assessment tools for each disorder and for cross disorder tools.
	DEPRESSION	APA-Dep-A, APA LEVEL 2, Depression, (Adult)	APA-Dep-C, APA Depression Emerging Measures (Child)	BDI-II, Beck Depression Inventory-II	CDI2, Children’s Depression Inventory 2	CES-D, Center for Epidemiologic Studies Depression Scale	CESDC, Center for Epidemiological Studies Depression Scale for Children	CESDR, Center for Epidemiologic Studies Depression Scale Revised	EPDS, Edinburgh Postnatal Depression Scale	GDS-LF, Geriatric Depression Scale Long-form	GDS-SF, Geriatric Depression Scale Short-form	HAMD, Hamilton Depression Rating Scale	IDS, Inventory of Depressive Symptomatology	MADRS, Montgomery-Åsberg Depression Rating Scale	MFQ, Mood and Feelings Questionnaire	MFQS, Mood and Feelings Questionnaire (Short version)	PHQ9, Patient Health Questionnaire 9	QIDS, Quick Inventory of Depressive Symptomatology	RADS2, Reynolds Adolescent Depression Scale 2	ZDS, Zung Self-Rating Depression Scale
	APA-Dep-A, APA LEVEL 2, Depression, (Adult)
	APA-Dep-C, APA Depression Emerging Measures (Child)	54.932
	BDI-II, Beck Depression Inventory-II	28.8041	20.2381
	CDI2, Children’s Depression Inventory 2	15.1361	39.4345	51.9759
	CES-D, Center for Epidemiologic Studies Depression Scale	28	55.1879	44.4295	50.5187
	CESDC, Center for Epidemiological Studies Depression Scale for Children	28	53.3155	42.7575	47.5799	93.75
	CESDR, Center for Epidemiologic Studies Depression Scale Revised	19.6667	25.7449	40.5701	39.8929	52.5	51.25
	EPDS, Edinburgh Postnatal Depression Scale	19.6667	30.5918	36.0017	35.7687	51.0417	44.7917	58.3333
	GDS-LF, Geriatric Depression Scale Long-form	29.1852	44.1488	32.2176	30.4983	56.3699	53.8352	37.5379	41.4268
	GDS-SF, Geriatric Depression Scale Short-form	49.8519	63.4847	27.6349	26.8277	42.1181	41.1806	32.4306	32.5	63.9931
	HAMD, Hamilton Depression Rating Scale	8.20106	9.52381	36.9048	29.7371	25.4369	25.4369	40.8163	29.5884	22.2108	15.3605
	IDS, Inventory of Depressive Symptomatology	7.55556	17.2083	45.6173	38.9284	30.0694	33.2639	51.5509	30.6944	32.7525	26.7708	55.5125
	MADRS, Montgomery-Åsberg Depression Rating Scale	28	35.1199	39.8944	39.6803	65	58.75	75	64.1667	53.8005	43.2986	43.9119	45.2778
	MFQ, Mood and Feelings Questionnaire	18.9777	22.5594	52.7794	59.9313	42.4842	44.6133	45.5281	36.2506	27.6338	20.3269	30.4715	42.4351	41.9592
	MFQS, Mood and Feelings Questionnaire (Short version)	24.8656	36.1496	53.4657	42.2963	43.6793	45.1246	33.4849	23.7556	30.334	20.5993	13.4833	29.6714	24.7418	36.8962
	PHQ9, Patient Health Questionnaire 9	19.6667	25.7449	46.4325	40.1054	51.6667	49.1667	85.8333	60	34.2045	33.6111	35.3707	46.1111	76.6667	48.0504	32.0396
	QIDS, Quick Inventory of Depressive Symptomatology	7.29167	15.1855	32.4879	30.0954	23.4323	27.3542	56.3359	26.3359	21.0253	20.1904	34.6542	50.4097	42.0104	34.7849	32.5021	47.4141
	RADS2, Reynolds Adolescent Depression Scale 2	19.5556	43.5757	49.9048	64.5452	49.9583	51.5556	30.3148	34.3889	30.3081	27.2708	25.1638	43.6667	32.4444	54.0261	48.3754	29.9444	24.3186
	ZDS, Zung Self-Rating Depression Scale	15.6667	28.1224	59.131	43.5672	47.9167	46.6667	64.5833	44.375	43.4407	31.25	42.9442	53.4375	51.6667	39.5641	31.4552	58.75	40.6797	38.3889
	ANXIETY	APA-Anx-A, APA Combined Anxiety Emerging Measures (Adult)**	APA-Anx-C, APA Combined Anxiety Emerging Measures (Child)**	BAI, Beck Anxiety Inventory	GAD7, Generalised Anxiety Disorder Assessment	HAMA, Hamilton Anxiety Rating Scale	LSAS, Liebowitz Social Anxiety Scale	MASC, Multidimensional Anxiety Scale for Children	RCMAS, Children's Manifest Anxiety Scale - Revised	SCARED, Screen for Child Anxiety Related Disorders	SCAS, Spence Children's Anxiety Scale	SPIN, Social Phobia Inventory	STAI, State Trait Anxiety Inventory	ZAS, Zung Self-Rating Anxiety Scale
	APA-Anx-A, APA Combined Anxiety Emerging Measures (Adult)**
	APA-Anx-C, APA Combined Anxiety Emerging Measures (Child)**	86.3971
	BAI, Beck Anxiety Inventory	29.5396	28.6879
	GAD7, Generalised Anxiety Disorder Assessment	39.8808	42.2611	26.9841
	HAMA, Hamilton Anxiety Rating Scale	29.1805	28.8957	41.1096	21.4286
	LSAS, Liebowitz Social Anxiety Scale	60.225	63.3535	22.449	39.7959	15.3061
	MASC, Multidimensional Anxiety Scale for Children	45.6051	44.5052	39.9485	29.0867	34.4224	29.6
	RCMAS, Children's Manifest Anxiety Scale - Revised	49.6711	49.8502	29.3765	43.6346	27.2236	37.0679	49.9825
	SCARED, Screen for Child Anxiety Related Disorders	50.8692	56.4467	37.8508	40.6822	34.6396	49.4048	57.3396	54.5941
	SCAS, Spence Children's Anxiety Scale	46.4519	51.2678	30.7187	38.2445	27.9529	46.2963	49.5916	49.9127	70.4949
	SPIN, Social Phobia Inventory	63.7213	56.8293	29.071	32.1799	20.9679	67.6471	40.4196	37.5019	36.875	33.7468
	STAI, State Trait Anxiety Inventory	22.9708	23.1293	26.9522	28.2917	34.6922	18.75	31.0035	36.0911	26.5386	26.6348	24.5625
	ZAS, Zung Self-Rating Anxiety Scale	11.7208	11.8874	48.9701	9.54167	45.0374	6	23.0958	20.5246	28.0216	18.8638	23.6654	17
	PTSD	APA-PTSD-A, APA PTSD Emerging measures (Adults)	APA-PTSD-C, APA PTSD Emerging measures (Children)	CAPS-5, Clinician-Administered PTSD Scale for DSM-5 (Adult)	CAPS-5-CV, Clinician-Administered PTSD Scale for DSM-5 (Child/Adolescent version)	CPSS-V, Child PTSD Symptom Scale for DSM-V	PCL-5, PTSD Checklist for DSM-5	PC-PTSD-5, Primary Care PTSD Screen for DSM-5	PSS-SR5, PTSD Scale-Self Report for DSM-5	SPRINT, Short PTSD Rating Interview
	APA-PTSD-A, APA PTSD Emerging measures (Adults)
	APA-PTSD-C, APA PTSD Emerging measures (Children)	100
	CAPS-5, Clinician-Administered PTSD Scale for DSM-5 (Adult)	40.6088	40.6088
	CAPS-5-CV, Clinician-Administered PTSD Scale for DSM-5 (Child/Adolescent version)	39.3977	39.3977	78.3457
	CPSS-V, Child PTSD Symptom Scale for DSM-V	33.6115	33.6115	47.4598	58.9261
	PCL-5, PTSD Checklist for DSM-5	43.8125	43.8125	71.3831	58.7046	54.0048
	PC-PTSD-5, Primary Care PTSD Screen for DSM-5	49.537	49.537	34.0614	34.5992	37.6731	36.375
	PSS-SR5, PTSD Scale-Self Report for DSM-5	33.0634	33.0634	57.5308	65.3213	68.261	58.0241	43.2413
	SPRINT, Short PTSD Rating Interview	25.5556	25.5556	18.7543	27.0448	34.9652	16.3	36.4931	37.2781
	BIPOLAR/MANIA	ASRMS, Altman Self-Rating Mania Scale	HCL32, Hypomania Checklist-32	ISS, Internal State Scale	MDQ, Mood Disorder Questionnaire	YMS, Young Mania Scale
	ASRMS, Altman Self-Rating Mania Scale
	HCL32, Hypomania Checklist-32	23.6729
	ISS, Internal State Scale	24.1148	41.2791
	MDQ, Mood Disorder Questionnaire	24.2347	40.9344	36.8096
	YMS, Young Mania Scale	18.8017	25.7072	16.4146	37.9227
	OCD	CY-BOCS, Children's Yale-Brown Obsessive Compulsive Scale & ChecklistTM	DOCS, Dimensional Obsessive-Compulsive Scale	FOCI, Florida Obsessive Compulsive InventoryTM	OCI-CV, Child Version of the Obsessive Compulsive Inventory	OCI-R, Obsessive-Compulsive-Inventory Revised	PI-WSUR, Padua Inventory –Washington State University Revision	VOCI, Vancouver Obsessional Compulsive Inventory	Y-BOCS, Yale Brown Obsessive Compulsive Symptom Scale & ChecklistTM
	CY-BOCS, Children's Yale-Brown Obsessive Compulsive Scale & ChecklistTM
	DOCS, Dimensional Obsessive-Compulsive Scale	42.3155
	FOCI, Florida Obsessive Compulsive InventoryTM	84.6955	41.4857
	OCI-CV, Child Version of the Obsessive Compulsive Inventory	53.9198	52	63.3644
	OCI-R, Obsessive-Compulsive-Inventory Revised	47.2467	54.9967	54.9108	79.3803
	PI-WSUR, Padua Inventory –Washington State University Revision	57.3073	43.7765	53.9871	48.3399	41.1774
	VOCI, Vancouver Obsessional Compulsive Inventory	68.9748	49.268	66.7236	69.0101	57.0172	56.8489
	Y-BOCS, Yale Brown Obsessive Compulsive Symptom Scale & ChecklistTM	90.1455	44.0723	81.8529	52.4426	46.7171	58.778	67.8383
	ADDICTION	ADS, Alcohol Dependence Scale	ASI-5, Addiction Severity Index 5th Edition	ASSIST-3, Alcohol, Smoking and Substance Involvement Screening Test 3.0	AUDIT, Alcohol Use Disorders Identification Test	CAGE, CAGE	CRAFFT, CRAFFT v2.1	DAST-10,Drug Abuse Screening Test-10	DAST-20, Drug Abuse Screening Test-20	DUDIT, Drug Use Disorders Identification Test	MAST, Michigan Alcoholism Screening Test	OCDS, Obsessive-Compulsive Drinking Scale	SMAST, Shortened Michigan Alcoholism Screening Test	TWEAK, TWEAK
	ADS, Alcohol Dependence Scale
	ASI-5, Addiction Severity Index 5th Edition	37.9094
	ASSIST-3, Alcohol, Smoking and Substance Involvement Screening Test 3.0	28.4114	19.9155
	AUDIT, Alcohol Use Disorders Identification Test	29.6	20.389	76.5714
	CAGE, CAGE	26.24	23.7034	39.2857	47.625
	CRAFFT, CRAFFT v2.1	29.4629	20.5468	73.4568	86.1975	41.0714
	DAST-10,Drug Abuse Screening Test-10	53.2	39.3194	38.1429	50	43	39.7857
	DAST-20, Drug Abuse Screening Test-20	39.6644	32.9532	60.1429	66.4062	47.2308	63.2857	54.8077
	DUDIT, Drug Use Disorders Identification Test	28.8	20.9414	77.1348	78.0992	48.3858	70.366	47.4277	68.6094
	MAST, Michigan Alcoholism Screening Test	38.5389	27.8407	73.2671	75.2404	44.3242	73.4573	45.7403	79.1424	80.7633
	OCDS, Obsessive-Compulsive Drinking Scale	33.2	30.1298	56.2147	48.9796	46.875	49.5627	40.75	56.6267	65.8964	55.7947
	SMAST, Shortened Michigan Alcoholism Screening Test	29.5953	20.0877	89.4336	84.6229	44.8023	74.6352	43.064	65.7159	80.1923	78.6713	52.7481
	TWEAK, TWEAK	21.12	19.2841	82.0312	72	37.5	69.1358	28	53.625	62.8099	63.2396	44.898	78.1065
	ASD	AAA, Adult Asperger Assessment	ADI-R, Autism Diagnostic Interview Revised;	AQ-A, Autism spectrum quotient (Adult)	AQ-A-10, Autism spectrum quotient 10 (Adult)	AQ-Adol, Autism spectrum quotient (Adolescent);	AQ-Adol-10, Autism spectrum quotient 10 (Adolescent);	AQ-C, Autism spectrum quotient (Child)	AQ-C-10, Autism spectrum quotient 10 (Child);	ASSQ, Autism Spectrum Screening Questionnaire	BAPQ, Broad Autism Phenotype Questionnaire	CARS2-HF, Childhood Autism Rating Scale 2 (High functioning version)	CARS2-ST, Childhood Autism Rating Scale 2 (Standard version)	CAST, Childhood Autism Spectrum Test	EQ-A, Emotion Quotient (Adult)	EQ-Adol, Emotion Quotient (Adolescent)	EQSQ, Child Emotion Quotient - Systemizing Quotient	GARS-3, Gilliam Autism Rating Scale, 3rd Edition	M-Chat, M-Chat Revised, 2018 edition	SCQ, Social Communication Questionnaire	SQ-A, Systemizing Quotient (Adult)	SQ-Adol, Systemizing Quotient (Adolescent)	SRS2, Social Responsiveness Scale-2
	AAA, Adult Asperger Assessment
	ADI-R, Autism Diagnostic Interview Revised;	60.3863
	AQ-A, Autism spectrum quotient (Adult)	61.5218	43.5612
	AQ-A-10, Autism spectrum quotient 10 (Adult)	60.581	37.4425	61.5178
	AQ-Adol, Autism spectrum quotient (Adolescent);	61.5218	43.5612	100	61.5178
	AQ-Adol-10, Autism spectrum quotient 10 (Adolescent);	64.7311	38.8397	57.04	67.5	57.04
	AQ-C, Autism spectrum quotient (Child)	61.5218	43.5612	100	61.5178	100	57.04
	AQ-C-10, Autism spectrum quotient 10 (Child);	64.7311	39.5761	57.04	77.5	57.04	90	57.04
	ASSQ, Autism Spectrum Screening Questionnaire	66.5929	54.6181	55.3494	44.5816	55.3494	59.3628	55.3494	59.3628
	BAPQ, Broad Autism Phenotype Questionnaire	46.2473	30.8098	42.0294	65.4317	42.0294	51.2016	42.0294	51.2016	41.0482
	CARS2-HF, Childhood Autism Rating Scale 2 (High functioning version)	45.7632	44.7408	37.7919	40.898	37.7919	39.7959	37.7919	48.2959	47.496	23.6525
	CARS2-ST, Childhood Autism Rating Scale 2 (Standard version)	41.1925	44.7408	31.6694	34.7755	31.6694	33.6735	31.6694	42.1735	47.496	23.6525	92.8571
	CAST, Childhood Autism Spectrum Test	77.1617	60.4062	58.1906	50.1932	58.1906	57.9075	58.1906	57.9075	65.9384	39.171	36.3911	34.5905
	EQ-A, Emotion Quotient (Adult)	41.4342	31.0832	39.1544	45.4167	39.1544	45.4167	39.1544	45.4167	38.2844	63.9064	22.2755	22.2755	40.2467
	EQ-Adol, Emotion Quotient (Adolescent)	41.4342	31.0832	39.1544	45.4167	39.1544	45.4167	39.1544	45.4167	38.2844	63.9064	22.2755	22.2755	40.2467	100
	EQSQ, Child Emotion Quotient - Systemizing Quotient	29.9119	33.4215	40.6688	23.2716	40.6688	29.6364	40.6688	20.9587	26.4822	17.8839	32.6791	31.5386	31.4637	29.188	29.188
	GARS-3, Gilliam Autism Rating Scale, 3rd Edition	59.8855	46.4111	64.0692	51.6418	64.0692	46.9836	64.0692	47.9747	56.8759	41.9158	28.1631	28.1631	60.1303	42.1062	42.1062	35.6646
	M-Chat, M-Chat Revised, 2018 edition	63.0775	61.043	44.5	46.5	44.5	54	44.5	57.75	56.1551	38.3478	47.6216	47.6216	63.6213	44.5	44.5	25.2088	50.707
	SCQ, Social Communication Questionnaire	61.8409	53.8205	52.4379	45	52.4379	43.5	52.4379	43.5	59.3215	36.5341	49.6294	49.6294	64.3156	39.1667	39.1667	30.2883	58.4816	63.1755
	SQ-A, Systemizing Quotient (Adult)	10.7126	9.10399	28.4989	13.0625	28.4989	16.4847	28.4989	7.31806	6.88881	3.24074	9.49647	5.12785	12.0336	6.03575	6.03575	52.3753	16.2047	2.75556	9.43819
	SQ-Adol, Systemizing Quotient (Adolescent)	11.7105	9.84939	29.9619	14.3338	29.9619	13.5231	29.9619	9.3082	8.23493	4.05225	11	6.25937	13.2327	7.64699	7.64699	46.4788	16.2574	5.07805	10.1588	70.0224
	SRS2, Social Responsiveness Scale-2	64.3	47.226	57.8382	52.4497	57.8382	62.8047	57.8382	61.6805	66.4845	45.0907	40.1679	37.9667	60.3848	42.7812	42.7812	29.5435	55.9637	55.1428	51.982	8.71282	10.7116
	ADHD	APA Inatt, APA Inattention Emerging Measures (SNAP-IV)	ASRS-5, World Health Organization ADHD Self-Report Screening Scale for DSM-5	ASRS-Checklist, Adult ADHD Self-Report Scale Symptom Checklist	CAARS, Conners Adult ADHD Rating Scale (S-L)	Conners 3, Conners-3rd EditionTM	DBDRS, Disruptive Behavior Disorders Rating Scale	DIVA 2, Diagnostic Interview for ADHD 2.0	NICHQ, NICHQ Vanderbilt Assessment Scale	WURS, Wender Utah Rating Scale
	APA Inatt, APA Inattention Emerging Measures (SNAP-IV)
	ASRS-5, World Health Organization ADHD Self-Report Screening Scale for DSM-5	33.912
	ASRS-Checklist, Adult ADHD Self-Report Scale Symptom Checklist	40.2263	53.4722
	CAARS, Conners Adult ADHD Rating Scale (S-L)	40.5265	39.9105	50.6638
	Conners 3, Conners-3rd EditionTM	26.4681	21.4735	25.4308	44.2878
	DBDRS, Disruptive Behavior Disorders Rating Scale	21.8765	24.8889	32.037	44.6636	56.0057
	DIVA 2, Diagnostic Interview for ADHD 2.0	33.4679	52.6512	68.3467	56.8683	39.8082	39.3878
	NICHQ, NICHQ Vanderbilt Assessment Scale	16.4463	19.9008	20.9835	37.272	67.7995	65.6992	38.336
	WURS, Wender Utah Rating Scale	17.6386	16.1113	11.3996	27.4841	41.8699	31.5658	25.8851	43.3869
	EATING DISORDER	BITE, Bulimic Investigatroy Test, Edinburgh	EAT-26, Eating Attitudes Test-26	EDDS, Eating disorder diagnostic scale	EDE-Q, Eating Disorder Examination Questionnaire	EDI-3, Eating Disorder Inventory, Third edition	SCOFF, SCOFF
	BITE, Bulimic Investigatroy Test, Edinburgh
	EAT-26, Eating Attitudes Test-26	49.8696
	EDDS, Eating disorder diagnostic scale	78.592	47.1245
	EDE-Q, Eating Disorder Examination Questionnaire	65.4817	40.6725	70.2912
	EDI-3, Eating Disorder Inventory, Third edition	40.0423	50.9701	46.7054	49.688
	SCOFF, SCOFF	42.6425	30.1405	41.8482	55.1517	37.686
	SCHIZOPHRENIA	BPRS, Brief Psychiatric Rating Scale	CGI-SCH, Clinical Global Impression-Schizophrenia scale	NSA-16, Negative Symptom Assessment	PANSS, Positive and Negative Syndrome Scale	SANS, Scale for the Assessment of Negative Symptoms	SAPS, Scale for the Assessment of Positive Symptoms
	BPRS, Brief Psychiatric Rating Scale
	CGI-SCH, Clinical Global Impression-Schizophrenia scale	13.5417
	NSA-16, Negative Symptom Assessment	33.206	41.4062
	PANSS, Positive and Negative Syndrome Scale	52.4479	7.55556	27.7954
	SANS, Scale for the Assessment of Negative Symptoms	38.554	17.76	40.5948	29.5889
	SAPS, Scale for the Assessment of Positive Symptoms	27.3921	20.4152	30.9343	29.4802	29.8148
	CROSS-CATEGORY	APA-CC-A, APA DSM–5 Self-Rated Level 1 Cross-Cutting Symptom Measure (Adult)	APA-CC-C, APA DSM–5 Self-Rated Level 1 Cross-Cutting Symptom Measure (Child)	BSI, Brief Symptom Inventory	CBC, Child behaviour Checklist	CIDI CAPI, World Health Organization Composite International Diagnostic Interview, Computer Assisted Personal Interview, Version 21.1.4	DISC-IV, Diagnostic Interview Schedule for Children	K10+, Kessler Psychological Distress Scale	KSADS-PL-5, Kiddie Schedule for Affective Disorders and Schizophrenia, Lifetime Version, DSM-5	MINI, Mini International Neuropsychiatric Interview	PROMIS-Profile-A, PROMIS Profile 57 (Adult)	PROMIS-Profile-C, PROMIS Profile 49 (Child)	PROMIS-QB-A, PROMIS Question Bank (Adult)	PROMIS-QB-C, PROMIS Question Bank (Child)	SCID-5-CV, Structured Clinical Interview for DSM-5 - Clinical version	SCL-90-R, Symptom Checklist 90 Revised	SDS, Strengths and Difficulties Scale
	APA-CC-A, APA DSM–5 Self-Rated Level 1 Cross-Cutting Symptom Measure (Adult)
	APA-CC-C, APA DSM–5 Self-Rated Level 1 Cross-Cutting Symptom Measure (Child)	58.2337
	BSI, Brief Symptom Inventory	19.9527	13.3277
	CBC, Child behaviour Checklist	23.1676	18.3266	29.2171
	CIDI CAPI, World Health Organization Composite International Diagnostic Interview, Computer Assisted Personal Interview, Version 21.1.4	39.7296	39.6841	24.4849	27.3977
	DISC-IV, Diagnostic Interview Schedule for Children	36.4955	37.6852	23.2886	36.9364	60.6391
	K10+, Kessler Psychological Distress Scale	19.4234	20.7722	9.17364	14.421	19.7362	17.6195
	KSADS-PL-5, Kiddie Schedule for Affective Disorders and Schizophrenia, Lifetime Version, DSM-5	43.5088	46.0124	25.3614	40.4418	55.5438	64.7676	19.5474
	MINI, Mini International Neuropsychiatric Interview	39.1314	41.2339	24.675	33.782	57.8569	60.737	15.7653	55.7057
	PROMIS-Profile-A, PROMIS Profile 57 (Adult)	25.1572	29.8161	11.5441	19.7688	31.5047	18.9658	36.7522	20.4561	19.4808
	PROMIS-Profile-C, PROMIS Profile 49 (Child)	29.9824	32.7611	15.7787	26.3894	34.5768	22.6005	29.8805	23.447	23.6629	59.2189
	PROMIS-QB-A, PROMIS Question Bank (Adult)	44.1804	36.0028	23.5792	28.7814	31.9689	29.1321	26.8092	26.5563	34.3417	37.5193	35.3819
	PROMIS-QB-C, PROMIS Question Bank (Child)	25.9633	17.732	27.1044	31.643	23.5463	22.9609	46.6229	23.2991	26.9228	29.7229	33.3829	49.5769
	SCID-5-CV, Structured Clinical Interview for DSM-5 - Clinical version	46.4748	41.4959	21.4806	29.114	58.6831	59.931	25.2514	52.4677	57.8356	28.2049	34.9761	40.1778	31.0766
	SCL-90-R, Symptom Checklist 90 Revised	38.8663	37.7977	30.7594	39.9475	48.2906	46.2038	23.0208	40.2462	45.2654	32.7001	33.2237	33.6468	29.6031	44.8141
	SDS, Strengths and Difficulties Scale	24.9	29.5	18.2716	39.5076	25.5588	31.9371	23.15	35.2606	26.4454	15.33	29.8851	23.161	27.4587	27.2906	31.4132

## Sheet: Supplementary Table 5
Supplementary Table 5: List of abbreviations for assessment tools.
AAA	Adult Asperger Assessment
ADI-R	Autism Diagnostic Interview Revised
ADS	Alcohol Dependence Scale
APA Inatt	APA Inattention Emerging Measures (Parent)
APA-Anx-A	APA Anxiety Combined Emerging Measures (Adult)
APA-Anx-C	APA Anxiety Combined Emerging Measures (Child)
APA-CC-A	APA DSM–5 Self-Rated Level 1 Cross-Cutting Symptom Measure (Adult)
APA-CC-C	APA DSM–5 Self-Rated Level 1 Cross-Cutting Symptom Measure (Child)
APA-Dep-A	APA Depression Emerging Measures (Adult)
APA-Dep-C	APA Depression Emerging Measures (Child)
APA-PTSD-A	APA PTSD Emerging measures (Adults)
APA-PTSD-C	APA PTSD Emerging measures (Children)
AQ-A	Autism spectrum quotient (Adult)
AQ-A-10	Autism spectrum quotient 10 (Adult)
AQ-Adol	Autism spectrum quotient (Adolescent)
AQ-Adol-10	Autism spectrum quotient 10 (Adolescent)
AQ-C	Autism spectrum quotient (Child)
AQ-C-10	Autism spectrum quotient 10 (Child)
ASI-5	Addiction Severity Index 5th Edition
ASRMS	Altman Self-Rating Mania Scale
ASRS-5	World Health Organization Adult Attention-Deficit/Hyperactivity Disorder Self-Report Screening Scale for DSM-5
ASRS-Checklist	Adult ADHD Self-Report Scale Symptom Checklist
ASSIST-3	Alcohol, Smoking and Substance Involvement Screening Test 3.0
ASSQ	Autism Spectrum Screening Questionnaire
AUDIT	Alcohol Use Disorders Identification Test
BAI	Beck Anxiety Inventory
BAPQ	Broad Autism Phenotype Questionnaire
BDI-II	Beck Depression Inventory-II
BITE	Bulimic Investigatroy Test, Edinburgh
BPRS	Brief Psychiatric Rating Scale
BSI	Brief Symptom Inventory
CAARS	Conners Adult ADHD Rating Scale (S-L)
CAGE	CAGE
CAPS-5	Clinician-Administered PTSD Scale for DSM-5 (Adult)
CAPS-5-CV	Clinician-Administered PTSD Scale for DSM-5 (Child/Adolescent version)
CARS2-HF	Childhood Autism Rating Scale 2 (High functioning version)
CARS2-ST	Childhood Autism Rating Scale 2 (Standard version)
CAST	Childhood Autism Spectrum Test
CBC	Child behaviour Checklist
CDI2	Children’s Depression Inventory 2
CES-D	Center for Epidemiologic Studies Depression Scale
CESDC	Center for Epidemiological Studies Depression Scale for Children
CESDR	Center for Epidemiologic Studies Depression Scale Revised
CGI-SCH	Clinical Global Impression-Schizophrenia scale
CIDI CAPI	World Health Organization Composite International Diagnostic Interview, Computer Assisted Personal Interview, Version 21.1.4
Conners 3	Conners-3rd EditionTM
CPSS-V	Child PTSD Symptom Scale for DSM-V
CRAFFT	CRAFFT v2.1
CY-BOCS	Children's Yale-Brown Obsessive Compulsive Scale & Checklist
DAST-10	Drug Abuse Screening Test-10
DAST-20	Drug Abuse Screening Test-20
DBDRS	Disruptive Behavior Disorders Rating Scale
DISC-IV	Diagnostic Interview Schedule for Children
DIVA 2	Diagnostic Interview for ADHD 2.0
DOCS	Dimensional Obsessive-Compulsive Scale
DUDIT	Drug Use Disorders Identification Test
EAT-26	Eating Attitudes Test-26
EDDS	Eating disorder diagnostic scale
EDE-Q	Eating Disorder Examination Questionnaire
EDI-3	Eating Disorder Inventory, Third edition
EPDS	Edinburgh Postnatal Depression Scale
EQ-A	Emotion Quotient (Adult)
EQ-Adol	Emotion Quotient (Adolescent)
EQSQ	Child Emotion Quotient - Systemizing Quotient
FOCI	Florida Obsessive Compulsive Inventory
GAD7	Generalised Anxiety Disorder Assessment
GARS-3	Gilliam Autism Rating Scale, 3rd Edition
GDS-LF	Geriatric Depression Scale Long-form
GDS-SF	Geriatric Depression Scale Short-form
HAMA	Hamilton Anxiety Rating Scale
HAMD	Hamilton Depression Rating Scale
HCL32	Hypomania Checklist-32
IDS	Inventory of Depressive Symptomatology
ISS	Internal State Scale
K10+	Kessler Psychological Distress Scale
KSADS-PL-5	Kiddie Schedule for Affective Disorders and Schizophrenia, Lifetime Version, DSM-5
LSAS	Liebowitz Social Anxiety Scale
MADRS	Montgomery-Åsberg Depression Rating Scale
MASC	Multidimensional Anxiety Scale for Children
MAST	Michigan Alcoholism Screening Test
M-Chat	M-Chat Revised, 2018 edition
MDQ	Mood Disorder Questionnaire
MFQ	Mood and Feelings Questionnaire
MFQS	Mood and Feelings Questionnaire (Short version)
MINI	Mini International Neuropsychiatric Interview
NICHQ	NICHQ Vanderbilt Assessment Scale—PARENT
NSA-16	Negative Symptom Assessment
OCDS	Obsessive-Compulsive Drinking Scale
OCI-CV	Child Version of the Obsessive Compulsive Inventory
OCI-R	Obsessive-Compulsive-Inventory Revised
PANSS	Positive and Negative Syndrome Scale
PCL-5	PTSD Checklist for DSM-5
PC-PTSD-5	Primary Care PTSD Screen for DSM-5
PHQ9	Patient Health Questionnaire 9
PI-WSUR	Padua Inventory –Washington State University Revision
PROMIS-Profile-A	PROMIS Profile 57 (Adult)
PROMIS-Profile-C	PROMIS Profile 49 (Child)
PROMIS-QB-A	PROMIS Question Bank (Adult)
PROMIS-QB-C	PROMIS Question Bank (Child)
PSS-SR5	PTSD Scale-Self Report for DSM-5
QIDS	Quick Inventory of Depressive Symptomatology
RADS2	Reynolds Adolescent Depression Scale 2
RCMAS	Children's Manifest Anxiety Scale - Revised
SANS	Scale for the Assessment of Negative Symptoms
SAPS	Scale for the Assessment of Positive Symptoms
SCARED	Screen for Child Anxiety Related Disorders
SCAS	Spence Children's Anxiety Scale
SCID-5-CV	Structured Clinical Interview for DSM-5 - Clinical version
SCL-90-R	Symptom Checklist 90 Revised
SCOFF	SCOFF
SCQ	Social Communication Questionnaire
SDS	Strengths and Difficulties Scale
SMAST	Shortened Michigan Alcoholism Screening Test
SPIN	Social Phobia Inventory
SPRINT	Short PTSD Rating Interview
SQ-A	Systemizing Quotient (Adult)
SQ-Adol	Systemizing Quotient (Adolescent)
SRS2	Social Responsiveness Scale-2
STAI	State Trait Anxiety Inventory
TWEAK	TWEAK
VOCI	Vancouver Obsessional Compulsive Inventory
WURS	Wender Utah Rating Scale
Y-BOCS	Yale Brown Obsessive Compulsive Symptom Scale & ChecklistTM
YMS	Young Mania Scale
ZAS	Zung Self-Rating Anxiety Scale
ZDS	Zung Self-Rating Depression Scale
